# Supplementary material for: Allergenicity evaluation of five types of commercial food-derived oligopeptide products
Source: Royal Society of Chemistry journal article supplement (doi:10.1039/d2fo02825e), 2023-01-01
Supplement: d2fo02825e1.pdf [file d2fo02825e1.pdf]

The patient information is summarized in the table below.

**Table 1 Information of allergic patients**

| <b>Number</b> | <b>Sex</b> | <b>Age</b> | <b>Allergen<br/>(grade)</b> | <b>Symptoms</b> |
|---------------|------------|------------|-----------------------------|-----------------|
| 1             | female     | 3          | soybean (+)                 | urticaria       |
| 2             | female     | 2          | soybean (+)                 | urticaria       |
| 3             | male       | 34         | soybean (+)                 | urticaria       |
| 4             | female     | 8          | soybean (+)                 | urticaria       |
| 5             | male       | 2          | soybean (+)                 | urticaria       |
| 6             | female     | 2          | soybean (++)                | urticaria       |
| 7             | female     | 30         | soybean (++)                | urticaria       |
| 8             | female     | 35         | wheat (++)                  | urticaria       |
| 9             | female     | 28         | wheat (+)                   | urticaria       |
| 10            | female     | 8          | wheat (+)                   | urticaria       |
| 11            | male       | 40         | wheat (+++)                 | urticaria       |
| 12            | female     | 26         | shellfish (++)              | urticaria       |
| 13            | male       | 16         | shellfish (++)              | urticaria       |
| 14            | male       | 22         | shellfish (+)               | urticaria       |
| 15            | male       | 77         | marine fish (+)             | urticaria       |
| 16            | female     | 63         | marine fish (+)             | urticaria       |
| 17            | female     | 42         | marine fish (+)             | urticaria       |
| 18            | male       | 20         | marine fish<br>(+++)        | urticaria       |

(Allergen grades were determined by skin prick tests. )
